# Supplementary material for: Spin transport properties and spin logic gates in manganese phthalocyanine-based molecular combinational circuits
Source: Royal Society of Chemistry journal article supplement (doi:10.1039/c7tc02312j), 2017-01-01
Supplement: c7tc02312j1.pdf [file c7tc02312j1.pdf]

## Spin transport properties and spin logic gates in manganese phthalocyanine-based molecular combinational circuits

Wenkai Zhao<sup>1</sup>, Dongqing Zou<sup>2</sup>, Chuan-Lu Yang<sup>1,a)</sup>, Zhaopeng Sun<sup>1</sup>

<sup>1</sup> School of Physics and Optoelectronics Engineering, Ludong University, Yantai 264025, People's Republic of China

<sup>2</sup> School of Physics, State Key Laboratory of Crystal Materials, Shandong University, Jinan 250100, People's Republic of China

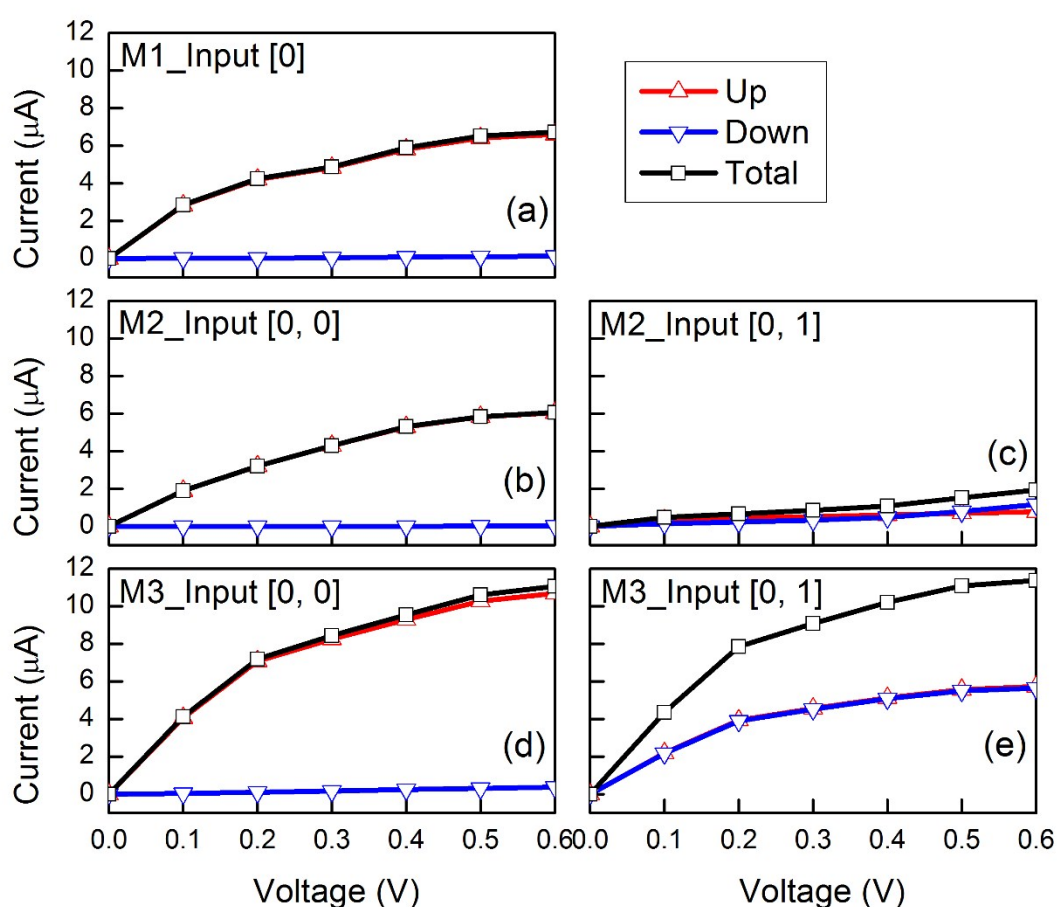

Fig. S1 (a)-(e) Calculated total and spin-resolved  $I$ - $V$  curves for M1-M3. (a) corresponds to the logic input state [0] for M1. (b) and (c) correspond to the logic input states [0, 0] and [0, 1] for M2, respectively. (d) and (e) correspond to the logic input states [0, 0] and [0, 1] for M3, respectively.

<sup>a)</sup> Electronic mail: [ycl@ldu.edu.cn](mailto:ycl@ldu.edu.cn).
